# Supplementary material for: Wounding tomato fruit elicits ripening-stage specific changes in gene expression and production of volatile compounds
Source: PubMed Central journal article supplement (PMC4339607; doi:10.1093/jxb/eru516), 2015-01-22
Supplement: supp_eru516_jexbot135350_file005.pdf [file supp_eru516_jexbot135350_file005.pdf]

**Supplementary data Table S1. Sequence of primers used for qRT-PCR**

| qPCR primers                       | Accession n° | Sequenze (5' – 3')         | Tm | amplicon |
|------------------------------------|--------------|----------------------------|----|----------|
| <b>Housekeeping identification</b> |              |                            |    |          |
| <i>SIGAPDH</i> for                 | U97257       | TGTTGGTGACAGCAGGTCAAGCA    | 57 | 234      |
| <i>SIGAPDH</i> rev                 |              | AAGACCACTCCAGGCCCA         | 56 |          |
| <i>SIGAPDH</i> for                 | NM_001247874 | GCCAAGGCTGGAATTGCTTTGAGC   | 59 | 150      |
| <i>SIGAPDH</i> rev                 |              | GCAGCGCCACCAACGAGTGA       | 58 |          |
| <i>SIHrBP1</i> for                 | NM_001247531 | TGGTGGAAAGTCGTCTGGACCC     | 60 | 156      |
| <i>SIHrBP1</i> rev                 |              | GCAGTTGCTTCAACAGGCGGG      | 58 |          |
| <i>SIEF1-α</i> for                 | XR_182811    | CCAAGGTGACCAAGGCTGCC       | 60 | 226      |
| <i>SIEF1-α</i> rev                 |              | AATCATGTCTGCCACCGCCT       | 56 |          |
| <i>SI</i> ACT for                  | BT013707     | TGGGTCTGCCAGGCACACA        | 58 | 226      |
| <i>SI</i> ACT rev                  |              | AGGGGTGCCTCAGTCAGGAGA      | 58 |          |
| <i>SIβ-TUB</i> for                 | DQ205342     | AAGGAACCGCCGCTGAGTCC       | 58 | 194      |
| <i>SIβ-TUB</i> rev                 |              | ACCAGCACCAAGACTGTCCAAAGA   | 57 |          |
| <i>SIDNAJ</i> for                  | NM_001247312 | ACGCAGAGCAGTGCAAGAACCT     | 57 | 160      |
| <i>SIDNAJ</i> rev                  |              | TCCTGTGCCTCTTGGGCAGC       | 58 |          |
| <b>VOCs related genes</b>          |              |                            |    |          |
| <i>SIDXS</i> for                   | AF143812     | TGTGCTAGAATCCCGCGGCT       | 58 | 276      |
| <i>SIDXS</i> rev                   |              | GGTGTTAGGCCAGCTTCCGCC      | 60 |          |
| <i>SICCoAOMT</i> for               | EU161983     | GCACCACCTGATGCACCCCT       | 59 | 120      |
| <i>SICCoAOMT</i> rev               |              | ATCGCCAACGGGAAGCTGGC       | 60 |          |
| <i>SLAADC1B</i> for                | DQ458999     | GCGTCGTTGGCAACTTTCATGCG    | 60 | 155      |
| <i>SLAADC1B</i> rev                |              | CCCCAACACAAGGAGCCTCTGC     | 60 |          |
| <i>SIβ-GLU</i> for                 | FJ151172     | CCGGTTTCGACCCGGTTGGG       | 60 | 279      |
| <i>SIβ-GLU</i> rev                 |              | GGCCACCCTGTCTCAGCAGC       | 60 |          |
| <i>SIGAD2</i> for                  | U21800       | AGGGCTAGGTTTGGAGGCAGGG     | 60 | 211      |
| <i>SIGAD2</i> rev                  |              | TGCATTGCGAATAGGCTGCACA     | 58 |          |
| <i>SI</i> for                      | DQ335097     | TCAGTCCGGGAGGGAAACCG       | 58 | 210      |
| <i>SIPSY</i> rev                   |              | CACCAAGGCTGCCTGCCTCAA      | 60 |          |
| <i>SLAcx</i> for                   | AY817109     | TCACCTCAAAGCAGGGGTTCGC     | 59 | 285      |
| <i>SLAcx</i> rev                   |              | TTGCTGCAGCTCTCGCGCTT       | 60 |          |
| <i>SIGST/GPX</i> for               | TC215287     | AGGGAGCACTTGGAGAGAAGCCT    | 59 | 182      |
| <i>SIGST/GPX</i> rev               |              | AGCCACACTGTCCCTCAGCA       | 58 |          |
| <i>SLAAT</i> for                   | AY534531     | AGGGTTTATTCGACTCCAAATCCCCA | 59 | 151      |
| <i>SLAAT</i> rev                   |              | AGGCCCTTCAATGAGTCTACCAGC   | 60 |          |
| <i>SICH</i> S for                  | X55195       | TGGTGATAGGGCAGCCGCAA       | 58 | 291      |
| <i>SICH</i> S rev                  |              | TGATCTAGAATCGCCGCCAC       | 58 |          |
| <i>SI</i> LoxC for                 | U37839       | ACAGCTGAGGAATGGGAGTGGT     | 57 | 204      |
| <i>SI</i> LoxC rev                 |              | CGAAAACACCTCGAACGCCGC      | 60 |          |
| <i>SI</i> LoxD for                 | U37840       | ACCGGACGCAACACAGCCTT       | 59 | 224      |
| <i>SI</i> LoxD rev                 |              | GCCACCAGTCCTCGTTGCGG       | 60 |          |
| <i>SICCD1B</i> for                 | AY576002     | TGGAGTCGCTGCAAAGGCGA       | 59 | 160      |
| <i>SICCD1B</i> rev                 |              | GCACTCCGGCAGATGGCCTA       | 59 |          |
| <i>SLADH</i> for                   | AJ277945     | GCTACCGGCACTGCGACGTT       | 60 | 288      |
| <i>SLADH</i> rev                   |              | GCGAAGCGGCCCCAGCTAAA       | 60 |          |

**Supplementary data Table S5 .** GeNorm analysis of the most stable housekeeping genes tested for the identification of the most stable one. The putative housekeeping genes were GAPDH, GAPDH1, HrBP1, Tub, DNAJ, EF1 $\alpha$ , Act.

| Samples | HrBP1    | Gadph1   | EF1a     | Tub      | GAPDH    | DNAJ     | Act      | Normalisation Factor |
|---------|----------|----------|----------|----------|----------|----------|----------|----------------------|
| Control | 21.9708  | 19.2415  | 21.1655  | 29.0684  | 21.7258  | 29.6473  | 21.5535  | <b>1.021391</b>      |
| Control | 24.308   | 20.1239  | 21.7665  | 28.9853  | 22.3121  | 29       | 21.5366  | <b>1.047223</b>      |
| Control | 24.6118  | 20.6021  | 22.0947  | 29       | 21.9192  | 30.7409  | 21.7778  | <b>1.062753</b>      |
| Control | 14.7203  | 5.5927   | 21.2629  | 29.2621  | 22.37    | 30.6997  | 21.2434  | <b>0.815568</b>      |
| Sliced  | 25.057   | 19.1963  | 22.0414  | 27.5388  | 22.2362  | 24.0819  | 22.0255  | <b>1.014491</b>      |
| Sliced  | 24.8176  | 19.1307  | 22.7722  | 27.7391  | 21.946   | 24.8707  | 22.1314  | <b>1.02187</b>       |
| Sliced  | 24.8997  | 19.3123  | 22.3969  | 27.277   | 21.7     | 25.4043  | 22.3573  | <b>1.021789</b>      |
| Sliced  | 24.8401  | 18.7668  | 22.0957  | 27.0083  | 21.4668  | 25.435   | 21.8712  | <b>1.009303</b>      |
| Control | 22.5333  | 20.2416  | 22.6424  | 25.4486  | 22.6154  | 28.5367  | 21.8958  | <b>1.025502</b>      |
| Control | 24       | 21.0929  | 23.0743  | 25.112   | 22.368   | 28.1132  | 21.8537  | <b>1.037579</b>      |
| Control | 23.709   | 21.6114  | 22.6897  | 25.1952  | 22.3092  | 29.0805  | 21.7795  | <b>1.041497</b>      |
| Control | 23.1074  | 19.2195  | 21.8967  | 25.1059  | 22.48    | 29.2771  | 22.1456  | <b>1.019258</b>      |
| Sliced  | 23.2842  | 19.7193  | 23.8126  | 27.2236  | 23.945   | 26.4258  | 23.4692  | <b>1.051331</b>      |
| Sliced  | 25.6919  | 20.123   | 24.1909  | 26.4464  | 22.7586  | 26.1683  | 24.0091  | <b>1.061533</b>      |
| Sliced  | 25.069   | 19.5038  | 23.5272  | 25.694   | 22.9348  | 26.2009  | 23.9238  | <b>1.045418</b>      |
| Sliced  | 24.1025  | 19.2179  | 23.1013  | 25.7567  | 23.0327  | 27.2954  | 24.2833  | <b>1.043953</b>      |
| Control | 23.15    | 20.43    | 22.5812  | 22.4078  | 23.9314  | 26.1234  | 22.4661  | <b>1.010988</b>      |
| Control | 23.1773  | 20.1917  | 22.7284  | 23.3229  | 23.5449  | 26.0342  | 22.5998  | <b>1.014199</b>      |
| Control | 22.5249  | 19.7363  | 22.4859  | 21.6856  | 23.4774  | 26.3782  | 22.8766  | <b>0.998037</b>      |
| Control | 21.0882  | 19.0138  | 22.3379  | 21.8316  | 23.4647  | 26.4879  | 23.1612  | <b>0.985692</b>      |
| Anoxia  | 22.5405  | 21.0678  | 25.0624  | 24.1353  | 23.93    | 26.2746  | 25.0146  | <b>1.054616</b>      |
| Anoxia  | 23.5247  | 21.4139  | 25.8253  | 24.265   | 23.9905  | 25.8871  | 25.1607  | <b>1.067937</b>      |
| Anoxia  | 22.8072  | 20.2754  | 24.6411  | 23.9297  | 23.492   | 27.1103  | 25.4997  | <b>1.051601</b>      |
| Anoxia  | 21.7094  | 20.5415  | 24.7806  | 24.3251  | 24.1769  | 26.4759  | 25.7903  | <b>1.051922</b>      |
| Wounds  | 24.3032  | 18.1486  | 19.9161  | 20.9318  | 22.4334  | 26.5349  | 19.9863  | <b>0.950821</b>      |
| Wounds  | 24.9773  | 18.1586  | 19.5491  | 20.41    | 22.2732  | 26.3379  | 19.6964  | <b>0.944706</b>      |
| Wounds  | 22.8839  | 17.1969  | 19.0625  | 20.464   | 21.8464  | 26.6924  | 19.9388  | <b>0.923588</b>      |
| Wounds  | 24.079   | 17.4766  | 18.3021  | 20.5798  | 21.8377  | 27.5249  | 19.5168  | <b>0.928999</b>      |
| Anoxia  | 24.3255  | 16.7337  | 20.0748  | 21.3031  | 21.5846  | 22.644   | 20.2314  | <b>0.918816</b>      |
| Anoxia  | 24.5836  | 18.5013  | 19.8285  | 22.1042  | 22.7795  | 23.4821  | 20.2592  | <b>0.949119</b>      |
| Anoxia  | 24.6203  | 18       | 19.9651  | 22.2378  | 21.3464  | 23.2797  | 20.2894  | <b>0.937633</b>      |
| Anoxia  | 23.743   | 17.1306  | 19.8359  | 22.1375  | 21.601   | 23.173   | 20.3307  | <b>0.925985</b>      |
|         |          |          |          |          |          |          |          |                      |
| M < 1.5 | 0.202125 | 0.323804 | 0.156103 | 0.210681 | 0.158758 | 0.191864 | 0.155427 |                      |

**Supplementary data Table S6: Functions of genes selected for real time qRT-PCR analysis**

| <b>Short name</b>           | <b>Accession number</b> | <b>Full name</b>                        | <b>Function</b>                                                                                                                 |
|-----------------------------|-------------------------|-----------------------------------------|---------------------------------------------------------------------------------------------------------------------------------|
| <i>SI<sub>Lox</sub>D</i>    | U37840                  | lipoxygenase D                          | <u>Defence</u> : Role in JA biosynthesis and defence (Hu et al., 2013; Chen et al., 2004)                                       |
| <i>SI<sub>ACXIA</sub></i>   | AY817109                | acyl-CoA oxidase 1A                     | <u>Defence</u> : Jasmonic acid biosynthesis (Li et al., 2005)                                                                   |
| <i>SI<sub>CCoAOMT</sub></i> | EU161983                | caffeoyl-CoA O-methyltransferase        | <u>Defence</u> : Aromatic compound biosynthesis, lignin biosynthesis induced by pathogens (Miao et al., 2008)                   |
| <i>SIGAD2</i>               | U21800                  | 2-oxoglutarate-dependent dioxygenase    | <u>Defence</u> : DOXC38-like - possible defence role (Kawai et al., 2014), wound inducible (Jacobsen and Olszewski (1996)       |
| <i>SIGST</i>                | TC215287                | glutathione-S-transferase/peroxidase    | <u>Defence</u> : Class tau family protects against oxidative stress (Csiszár et al., 2014; Kampranis et al., 2000)              |
| <i>SI<sub>β</sub>-GLU</i>   | FJ151172                | β-glucosidase                           | <u>Defence</u> : May be involved in defence against herbivory (Minic, 2008)                                                     |
| <i>SIAADC1B</i>             | DQ458999                | Aromatic amino acid decarboxylase       | <u>Aroma</u> : Biosynthesis of flavour/aroma VOCs (Tieman et al., 2006)                                                         |
| <i>SIADH</i>                | AJ277945                | alcohol dehydrogenase ( <i>GAD3</i> )   | <u>Aroma</u> : short chain ADH gene (SDR) of unknown function. Some SDRs are involved in VOC biosynthesis (Tieman et al., 2007) |
| <i>SIAAT</i>                | AY534531                | Acyl alcohol transferase                | <u>Aroma</u> : Volatile production during fruit ripening (esters) (Beekwilder et al., 2004)                                     |
| <i>SIPSY<sub>m</sub></i>    | DQ335097                | phytoene synthase                       | <u>Aroma</u> : Regulatory step in carotenoid biosynthesis (Bartley et al., 1992)                                                |
| <i>SICCD1B</i>              | AY576002                | Carotenoid cleavage dioxygenase 1B      | <u>Aroma</u> : Flavour-related volatile apocarotenoid biosynthesis (Simkin et al., 2004)                                        |
| <i>SIDXS</i>                | AF143812                | 1-deoxy-D-xylulose-5-phosphate synthase | <u>Aroma</u> : Regulatory step in carotenoid biosynthesis (Lois et al., 2000)                                                   |
| <i>SI<sub>Lox</sub>C</i>    | U37839                  | lipoxygenase C                          | <u>Aroma</u> : Biosynthesis of C6 VOC compounds (Chen et al., 2004)                                                             |
| <i>SICH<sub>S</sub></i>     | X55195                  | chalcone synthase                       | Flavonoid biosynthesis (O'Neill et al., 1990)                                                                                   |

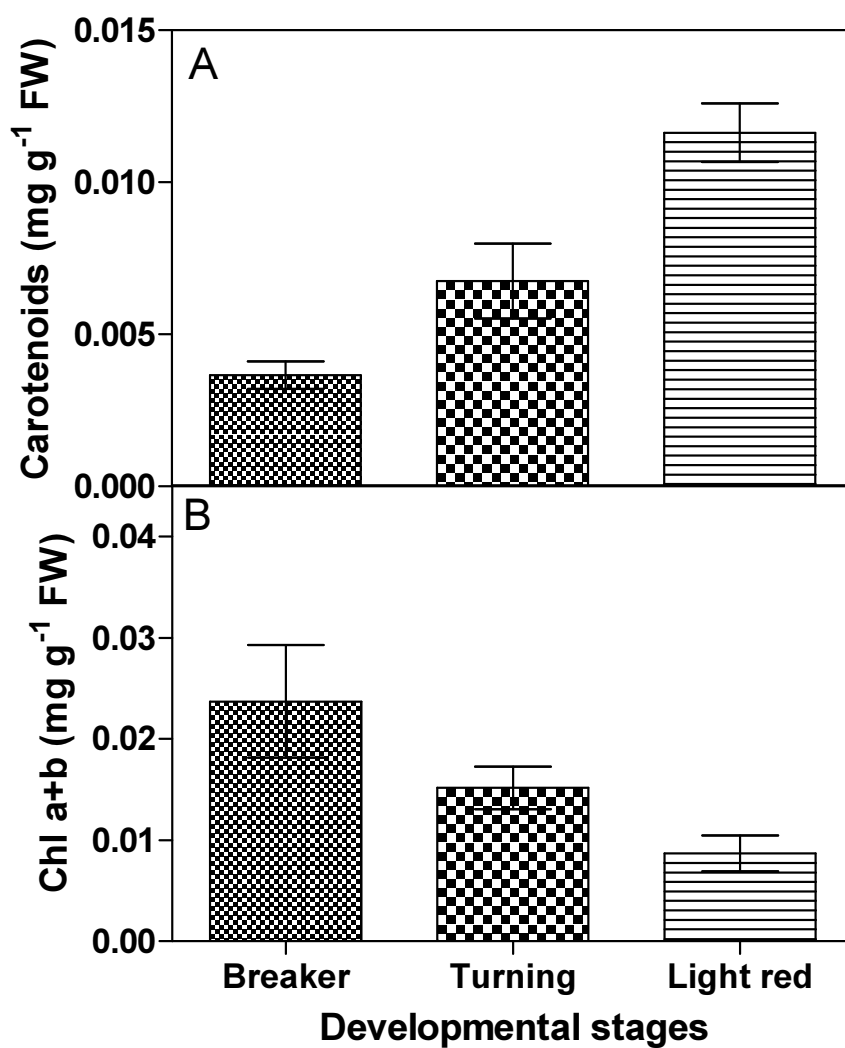

**Supplementary data Figure S1.** Total carotenoids and chlorophyll in *S. lycopersicum* cv. Luna Rossa and cv. AVG used in the qRT-PCR analysis. Values are means with standard deviations ( $n=3$ ).

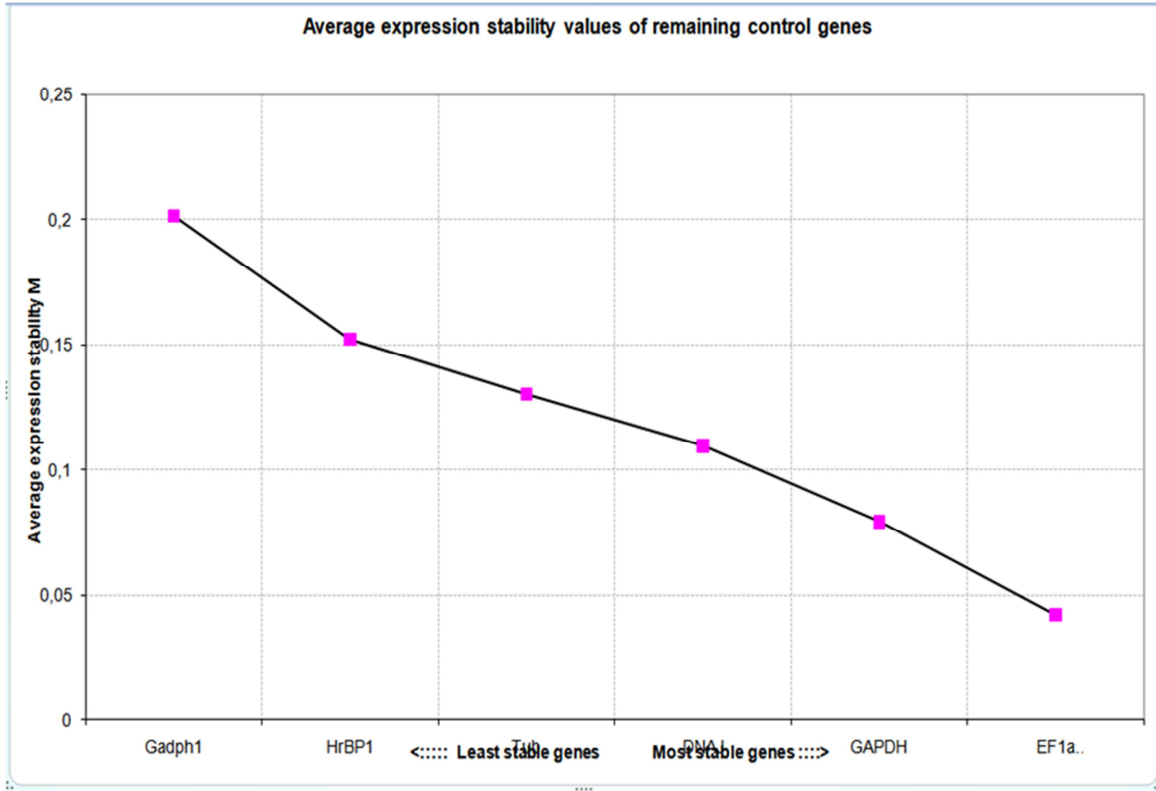

**Supplementary data Figure S2** Average stability of housekeeping genes using GeneNorm

**A**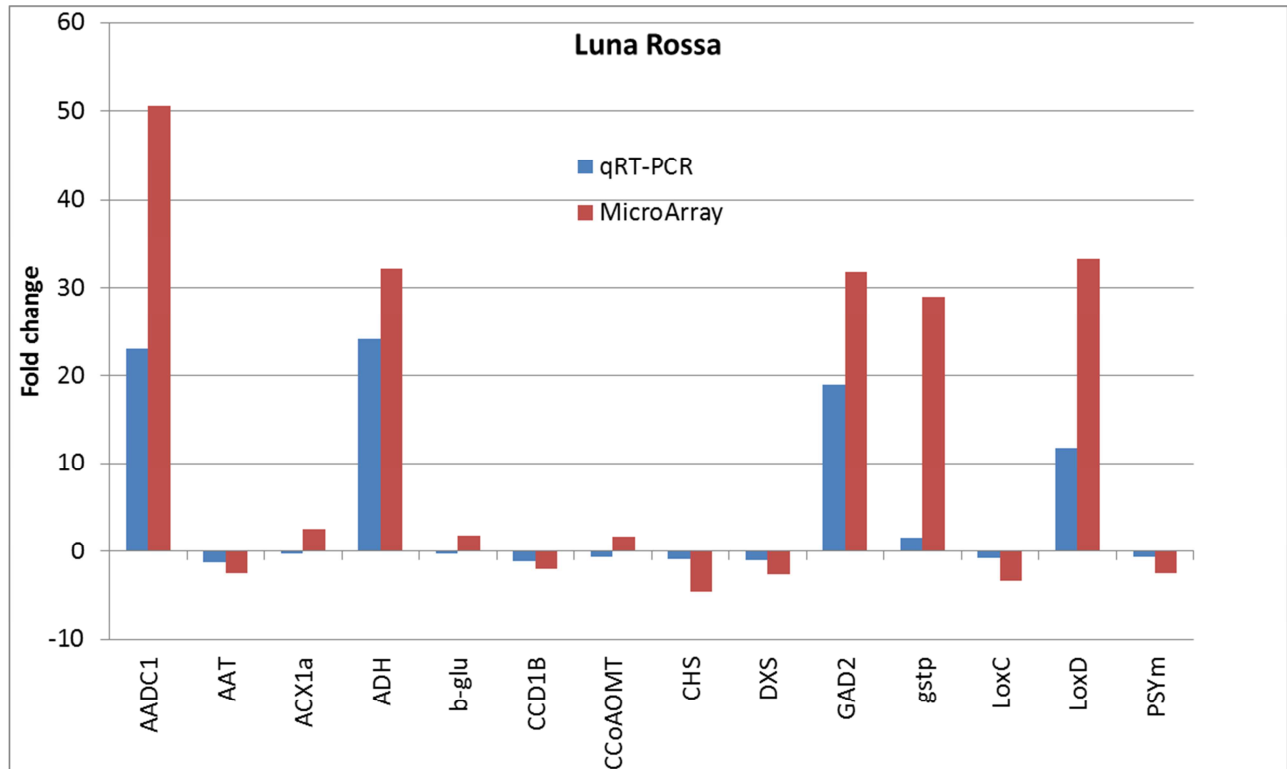**B**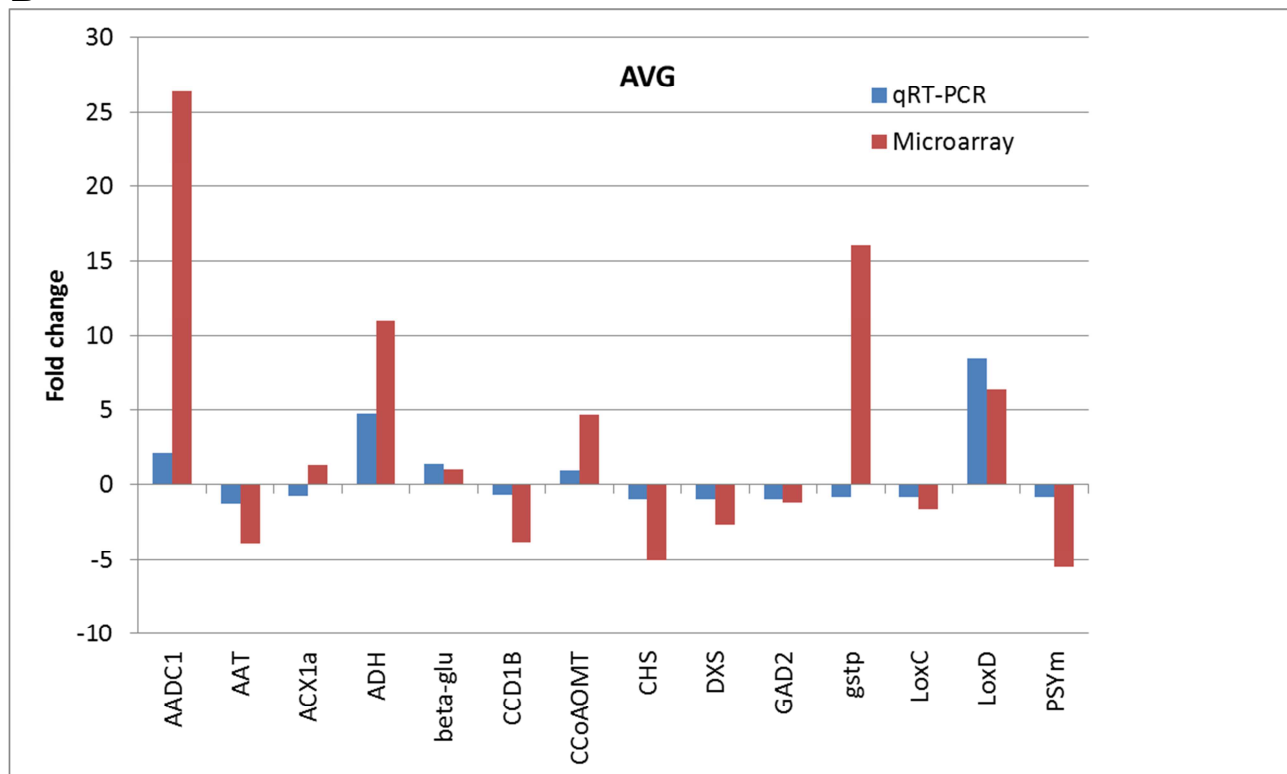

**Supplementary data Figure S3** Validation data by comparison qRT-PCR and microarray data using genes selected for the VOCs biosynthesis study in tomato fruits of (A) cv. AVG and (B) cv. Luna rossa harvested at the light red ripening stage and after 3 h from wounding.
